# Supplementary material for: A-to-I RNA editing in the rat brain is age-dependent, region-specific and sensitive to environmental stress across generations
Source: PubMed Central journal article supplement (PMC5759210; doi:10.1186/s12864-017-4409-8), 2018-01-08
Supplement: 12864_2017_4409_MOESM1_ESM.pdf [file 12864_2017_4409_MOESM1_ESM.pdf]

Fig S1

### Step 1 PCR with specific gene

read 1 seq primer barcode gene specific sequence

5h2c editing sites: ATACGTAATCCTA

Amplification \*35

gene specific sequence

read 1 seq primer barcode

5h2c editing sites: : ATACGTAATCCTA

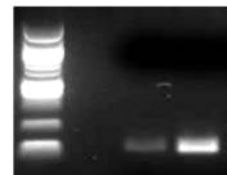

Gel separation+ purification+ pool samples

### Step 2 PCR

adaptors read 1 seq primer

read 1 seq primer barcode

5h2c editing sites: : ATACGTAATCCTA

gene specific sequence 2 adaptor

Amplification \*8

adaptors read 1 seq primer

barcode

5h2c editing sites: : ATACGTAATCCTA

adaptor

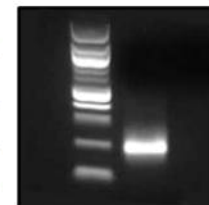

Gel separation+ purification

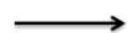

→ Illumina Seq
